# Supplementary material for: Attenuated dopamine signaling after aversive learning is restored by ketamine to rescue escape actions
Source: eLife journal article supplement (doi:10.7554/elife.64041), 2021-04-27
Supplement: supp [file elife-64041-supp-v1.zip]

Archive with 28 entries (28 files):
- elife_poa_e64041_Transparent_Reporting_File.pdf
- elife_poa_e64041_Figure_1_figure_supplement_1.pdf
- elife_poa_e64041_Figure_1_figure_supplement_2.pdf
- elife_poa_e64041_Figure_2_figure_supplement_1.pdf
- elife_poa_e64041_Figure_2_figure_supplement_2.pdf
- elife_poa_e64041_Figure_2_figure_supplement_3.pdf
- elife_poa_e64041_Figure_2_figure_supplement_4.pdf
- elife_poa_e64041_Figure_2_figure_supplement_5.pdf
- elife_poa_e64041_Figure_5_figure_supplement_1.pdf
- elife_poa_e64041_Figure_6_figure_supplement_1.pdf
- elife_poa_e64041_Figure_6_figure_supplement_2.pdf
- elife_poa_e64041_Figure_6_figure_supplement_3.pdf
- elife_poa_e64041_Figure_1_figure_supplement_1_source_data_1.xlsx
- elife_poa_e64041_Figure_1_figure_supplement_2_source_data_1.xlsx
- elife_poa_e64041_Figure_1_source_data_1.xlsx
- elife_poa_e64041_Figure_2_figure_supplement_1_source_data_1.xlsx
- elife_poa_e64041_Figure_2_figure_supplement_2_source_data_1.xlsx
- elife_poa_e64041_Figure_2_figure_supplement_3_source_data_1.xlsx
- elife_poa_e64041_Figure_2_figure_supplement_4_source_data_1.xlsx
- elife_poa_e64041_Figure_2_figure_supplement_5_source_data_1.xlsx
- elife_poa_e64041_Figure_3_Source_Data_File.xlsx
- elife_poa_e64041_Figure_4_Source_Data_File.xlsx
- elife_poa_e64041_Figure_5_figure_supplement_1_source_data_1.xlsx
- elife_poa_e64041_Figure_5_Source_Data_File.xlsx
- elife_poa_e64041_Figure_6_figure_supplement_1_source_data_1.xlsx
- elife_poa_e64041_Figure_6_figure_supplement_2_source_data_1.xlsx
- elife_poa_e64041_Figure_6_figure_supplement_3_source_data_1.xlsx
- elife_poa_e64041_Figure_6_source_data_1.xlsx
