# Supplementary material for: Attenuated dopamine signaling after aversive learning is restored by ketamine to rescue escape actions
Source: eLife journal article supplement (doi:10.7554/elife.64041), 2021-04-27
Supplement: supp [file elife-64041-supp-v1.zip › elife_poa_e64041_Figure_1_figure_supplement_1_source_data_1.xlsx]

## Sheet: Figure_S1a
% Failures					Latency to escape
Baseline	LH	LH+Saline			Baseline	LH	LH+Saline
10	82.9	80.6			3.81186	8.89726	8.58159
3.3333	66.6667	74.1			2.706	7.52783	8.56433
3.33333	100	100			2.176	10	10
0	57.1	44.8			1.39918	6.84614	5.9546
10	90	58.6			3.2473	9.265	7.52721

## Sheet: Figure_S1b
% Failures							Latency to escape
Learning context			Novel context				Learning context			Novel context
LH	LH + KET		LH	LH + KET			LH	LH + KET		LH	LH + KET
78.4	18.2		84	23.5			8.72151	7.50233		9.43324	5.029
63.6	47.6		93.3	41.2			8.24052	7.58025		9.96847	6.982
66.7	33.33		63.2	33.3			8.23747	6.72789		8.93783	6.01525
60	0		54.5	43.8			7.4044	3.77693		7.13509	6.88344
75	40		96	58.9			8.99073	3.086		10	8.58665
