# Supplementary material for: Attenuated dopamine signaling after aversive learning is restored by ketamine to rescue escape actions
Source: eLife journal article supplement (doi:10.7554/elife.64041), 2021-04-27
Supplement: supp [file elife-64041-supp-v1.zip › elife_poa_e64041_Figure_1_figure_supplement_2_source_data_1.xlsx]

## Sheet: Figure_S2b
Frequency
1.6
1.45
1.2
0.65
1.75
0.95

## Sheet: Figure_S2g
Day 1	Day 2	Day 4
6.288	4.748	5.956
6.736	4.304	5.428
5.736	4.928	5.66
6.136	3.96	5.88
6.132	2.92	5.252
6.292	4.732	5.88
6.708	3.404	5.648
6.584	4.628	5.892
6.028	3.924	5.92
5.88	6.644	4.628
6.172	4.644	4.86
6.148	5.908	4.488
3.588	2.592	4.248
1.532	3.272	5.296
6.952	6.708	4.472
6.056	6.204	4.224
0.092	2.908	4.82
6.092	5.012	6.68
7.968	4.512	4.992
6.44	4.276	5.232
5.844	4.388	4.976
5.712	4.968	6.156
5.684	4.52	5.876
5.304	6.408	4.808
5.9	1.44	5.548
5.348	5.756	5.956
6.012	4.444	6.084
5.228	7.088	6.024
6.356	4.724	6.324
0.724	4.476	5.488
6.008	5.296	5.088
6.932	5.528	5.48
5.728	0.404	6.828
1.324	5.528	5.716
5.712	5.576	7.14
5.608	2.36	6.268
7.224	0.92	4.708
6.408	2.316	4.756
6.004	1.484	2.26
6.776	0.528	2.632
6.2	3.06	3.272
1.076	0.116	5.14
7.404	4.324	5.448
6.456	4.376	5
5.704	5.04	4.984
4.792	5.544	5.008
5.432	5.744	4.368
5.284	6.32	4.624
5	5.224	4.72
0.768	4.916	4.928
5.836	5.04	5.34
5.232	5.272	4.42
5.704	4.696	2.9
5.704	5.94	5.184
6.432	3.884	2.584
5.908	6.476	0.032
5.012	3.632	1.084
0.412	1.92	4.468
6.436	7.884	3.004
6.348	0.64	2.568
7.272	7.86
6.784	4.98
5.912	6.824
6.38	3.84
5.688	3.8
0.556	4.752
6.572	4.84
6.948	4.148
0.596	4.648
7.188	3.92
4.932	5.004
5.136	4.1
5.52	4.436
4.352	1.744
4.688	5.616
4.784	4.336
5.204	3.672
5.488	2.184
4.904	4.32
5.664	4.872
5.188	5.176
5.284	7.168
5.536	6.332
5.22	5.312
5.524	5.224
5.68	0.984
5.816	6.116
5.036	5.596
4.388	4.62
5.184	7.112
7.392	5.796
5.828	5.864
6.352	6.84
6.76	5.012
7.264	5.836
6.584	3.68
1.144	3.64
3.58	6.104
3.812	3.712
5.704	2.74
3.744	5.008
1.96	4.468
7.66	5.34
7.592	4.328
2.616	0.872
4.748	5.704
4.416	0.228
4.488	5.232
4.792	0.324
4.92	1.228
4.848	3.92
4.996	0.96
4.244	7.68
5.268	3.352
6.04	0.74
5.096	1.512
5.452
2.012
2.276
5.628
5.172
5.216

## Sheet: Figure_S2h
Baseline	LH	LH + KET
3.557	2.843	4.355
2.73	3.432	3.604
2.06	2.99	2.475
1.565	1.728	2.347
2.814	4.525	2.946
