# Supplementary material for: Attenuated dopamine signaling after aversive learning is restored by ketamine to rescue escape actions
Source: eLife journal article supplement (doi:10.7554/elife.64041), 2021-04-27
Supplement: supp [file elife-64041-supp-v1.zip › elife_poa_e64041_Figure_1_source_data_1.xlsx]

## Sheet: Figure 1b
% Failures					Latency to escape
Baseline	LH	LH + KET			Baseline	LH	LH + KET
0	96.6667	33.3333			2.69	10	7.67
0	80	10			2.28	8.72	3.48
0	96.6667	96.6667			2.07	9.77	9.76
0	86.6667	6.66667			1.86	8.68	4.19
0	100	3.33333			2.3	10	6.47
3.33333	33.3333	0			2.34	3.46	2.49
0	86.6667	16.6667			1.96	9.34	4.23
0	43.3333	16.6667			1.7	6.2	5.58

## Sheet: Figure 1e
Peak (dF/F)									AUC
During shock				After shock					During shock				After shock
Induction start	Induction end	LH + KET		Induction start	Induction end	LH + KET			Induction start	Induction end	LH + KET		Induction start	Induction end	LH + KET
-0.077	0.062	-0.088		0.144	0.037	0.2138			-43.33	13.95	-62.39		56.82	11.17	102
-0.172	-0.048	-0.056		0.161	0.043	0.2138			-114.7	-18.25	-17.39		127.8	28.9	57.24
-0.1	0.053	0.046		0.168	0.05	0.06			-55.1	11.86	15.2		65.4	17.85	20.2
-0.1133	-0.084	-0.1038		0.105	0.11	0.1868			-62.65	20.1	-50.75		53.22	19.4	85.91
-0.088	-0.068	-0.094		0.077	0.027	0.098			-46.5	-35.97	-46.96		35.77	12.68	46.93
-0.05	0.03	-0.042		0.102	0.015	0.126			-20.92	6.76	-7.76		34.05	2.03	31.59
-0.04	-0.1	-0.07		0.089	0.13	0.172			-18.57	-9	-44.73		26.44	63.2	97.44
-0.13	-0.017	-0.088		0.225	0.016	0.081			-88.49	-2.58	-44		94.93	6.7	48.05
