# Supplementary material for: Attenuated dopamine signaling after aversive learning is restored by ketamine to rescue escape actions
Source: eLife journal article supplement (doi:10.7554/elife.64041), 2021-04-27
Supplement: supp [file elife-64041-supp-v1.zip › elife_poa_e64041_Figure_2_figure_supplement_1_source_data_1.xlsx]

## Sheet: Figure_S3b
Escape	Baseline								LH								LH+KET
	0.76	0.72	0.69	0.84	0.77	0.68	0.66		0.41	0.38	0.34	0.43	0.14	0.59	0.31		0.54	0.5	0.42	0.78	0.48	0.73	0.48
2	0.64	0.61	0.56	0.8	0.69	0.56	0.52		0.21	0.22	0.19	0.31	0.09	0.42	0.21		0.28	0.29	0.19	0.69	0.32	0.61	0.26
	0.55	0.54	0.49	0.76	0.62	0.47	0.44		0.11	0.11	0.11	0.23	0.05	0.3	0.15		0.14	0.19	0.09	0.61	0.25	0.49	0.17
4	0.5	0.48	0.45	0.72	0.56	0.4	0.39		0.06	0.07	0.07	0.19	0.04	0.21	0.11		0.08	0.13	0.04	0.54	0.2	0.4	0.12
	0.46	0.42	0.42	0.69	0.5	0.34	0.34		0.04	0.04	0.05	0.15	0.02	0.16	0.08		0.05	0.09	0.02	0.47	0.15	0.35	0.09
6	0.44	0.38	0.38	0.66	0.45	0.29	0.29		0.02	0.02	0.03	0.14	0.02	0.14	0.06		0.03	0.07	0.01	0.42	0.12	0.3	0.07
	0.42	0.35	0.35	0.63	0.41	0.25	0.26		0.01	0.01	0.02	0.13	0.01	0.11	0.04		0.02	0.06	0.01	0.36	0.09	0.25	0.05
8	0.4	0.31	0.32	0.6	0.37	0.22	0.23		0.01	0	0.01	0.12	0.01	0.09	0.02		0.01	0.04	0.01	0.31	0.07	0.22	0.03
	0.39	0.27	0.29	0.58	0.34	0.19	0.21		0	0	0.01	0.11	0	0.08	0.01		0.01	0.04	0	0.26	0.05	0.18	0.01
10	0.38	0.24	0.26	0.56	0.32	0.16	0.2		0	0	0	0.1	0	0.07	0.01		0.01	0.03	0	0.22	0.04	0.15	0
	0.38	0.21	0.23	0.53	0.3	0.14	0.18		0	0	0	0.09	0	0.06	0		0	0.03	0	0.19	0.04	0.12	0
Failure	Baseline								LH								LH+KET
	0.2	0.13	0.2	0.14	0.14	0.08	0.32		0.46	0.41	0.39	0.5	0.83	0.38	0.66		0.23	0.2	0.25	0.15	0.38	0.2	0.45
2	0.08	0.1	0.11	0.11	0.12	0.06	0.18		0.31	0.28	0.35	0.43	0.77	0.22	0.54		0.09	0.08	0.1	0.11	0.25	0.1	0.23
	0.05	0.09	0.07	0.08	0.11	0.04	0.12		0.24	0.21	0.32	0.39	0.72	0.18	0.47		0.06	0.04	0.05	0.1	0.19	0.06	0.14
4	0.03	0.09	0.05	0.07	0.09	0.02	0.09		0.2	0.17	0.29	0.36	0.68	0.15	0.43		0.05	0.02	0.03	0.09	0.16	0.03	0.1
	0.02	0.08	0.04	0.05	0.07	0.01	0.07		0.18	0.14	0.27	0.33	0.64	0.12	0.39		0.04	0.01	0.02	0.08	0.14	0.02	0.08
6	0.02	0.08	0.03	0.04	0.06	0.01	0.05		0.15	0.13	0.25	0.3	0.62	0.1	0.36		0.04	0	0.01	0.07	0.13	0	0.06
	0.01	0.07	0.03	0.03	0.04	0	0.03		0.13	0.11	0.23	0.27	0.6	0.08	0.32		0.04	0	0.01	0.06	0.11	0	0.05
8	0.01	0.07	0.02	0.02	0.03	0	0.02		0.11	0.1	0.21	0.25	0.58	0.06	0.3		0.03	0	0	0.05	0.1	0	0.05
	0	0.06	0.02	0.01	0.02	0	0.01		0.1	0.08	0.19	0.22	0.56	0.04	0.29		0.03	0	0	0.04	0.09	0	0.04
10	0	0.06	0.01	0.01	0.01	0	0.01		0.09	0.07	0.17	0.2	0.54	0.03	0.27		0.03	0	0	0.03	0.08	0	0.04
	0	0.05	0.01	0	0	0	0		0.08	0.06	0.15	0.18	0.52	0.03	0.26		0.02	0	0	0.02	0.07	0	0.03

## Sheet: Figure_S3c
First 20 trials	Last 20 trials
0.23	0.08
0.12	0.06
0.1	0.06
0.09	0.05
0.07	0.03
0.04	0.02
0.08	0.058
0.068	0.02
