# Supplementary material for: Attenuated dopamine signaling after aversive learning is restored by ketamine to rescue escape actions
Source: eLife journal article supplement (doi:10.7554/elife.64041), 2021-04-27
Supplement: supp [file elife-64041-supp-v1.zip › elife_poa_e64041_Figure_2_figure_supplement_2_source_data_1.xlsx]

## Sheet: Figure_S4b
Escape					Failure
Positive					Negative				Positive
Baseline	wLH	wLH + KET			Baseline	wLH	wLH + KET		Baseline	wLH	wLH + KET
4.812	6.2	3.532			2.788	1.348	1.612		6.572	4.972	4.812
2.732	4.28	4.652			2.52	1.772	1.88		5.56	4.868	6.892
4.44	4.652	5.028			3.748	2.04	2.468		6.84	5.56	7.104
4.652	4.44	5.188			3.908	1.88	2.04		6.252	5.988	5.4
4.28	4.972	4.868			3.532	2.2	3.16		6.464	5.292	7.904
3.908	4.548	3.852			2.36	1.988	1.988		5.772	5.508	4.868
3.268	2.092	2.52			3.692	1.932	2.732		6.148	4.652	7.372
4.068	3.212	2.948			3.48	1.72	2.36		5.772	5.028	5.612
4.708	4.652	5.612			3.692	1.932	3.748		7.96	7.8	6.04
3.692	4.068	4.708			3.532	1.12	1.772		5.828	4.92	5.56
3.852	3.372	4.492			2.788	1.988	3.108		5.132	5.132	6.2
4.492	5.452	4.76			3.852	2.092	2.252		6.784	6.148	6.36
