# Supplementary material for: Attenuated dopamine signaling after aversive learning is restored by ketamine to rescue escape actions
Source: eLife journal article supplement (doi:10.7554/elife.64041), 2021-04-27
Supplement: supp [file elife-64041-supp-v1.zip › elife_poa_e64041_Figure_2_figure_supplement_3_source_data_1.xlsx]

## Sheet: Figure_S5b
Escape					Failure
Positive					Negative				Positive
Day 1&2	Day 3&4	Day 5&6			Day 1&2	Day 3&4	Day 5&6		Day 1&2	Day 3&4	Day 5&6
14.81	24.33	105.4			18.26	17.88	80.09		60.26	23.17	70.34
89.13	61.93	50.63			81.99	46.3	26.26		89.23	33.55	123.6
45.79	52.82	64.51			12.99	26.16	28.6		60.63	66.12	34.46
30.32	21.26	35.71			38.61	15.34	13.11		46.07	12.58	44.47
12.63	145.2	117			60.99	37.39	46.77		12.91	153.3	134
86.88	154.9	158.6			27.68	44.61	18.6		77.93	50.94	128.6
