# Supplementary material for: Attenuated dopamine signaling after aversive learning is restored by ketamine to rescue escape actions
Source: eLife journal article supplement (doi:10.7554/elife.64041), 2021-04-27
Supplement: supp [file elife-64041-supp-v1.zip › elife_poa_e64041_Figure_2_figure_supplement_4_source_data_1.xlsx]

## Sheet: Figure_S6b
Escape					Failure
Positive					Negative				Positive
Day 3&4	Day 5&6				Day 3&4	Day 5&6			Day 3&4	Day 5&6
47.65	28.59				5.378	0			126.6	127.3
49.52	88.4				5.875	22.77			34.77	41.24
44.89	62.59				42.2	24.45			25.86	37.69
119.1	99.35				83.48	21.76			129.5	54.74
79.77	119.1				6.002	3.21			79.46	90.29
163.2	114.1				8.24	5.81			156	108.4
232.8	225.6				2.572	6.205			185.1	182.7
13.98	11.54				3.017	7.329			10.4	24.85
60.66	55.83				1.01	0.725			25.21	23.19
