# Supplementary material for: Attenuated dopamine signaling after aversive learning is restored by ketamine to rescue escape actions
Source: eLife journal article supplement (doi:10.7554/elife.64041), 2021-04-27
Supplement: supp [file elife-64041-supp-v1.zip › elife_poa_e64041_Figure_2_figure_supplement_5_source_data_1.xlsx]

## Sheet: Figure 2b
Control								Weak LH
Day 1	Day 2	Day 3	Day 4	Day 5	Day 6			Day 1	Day 2	Day 3	Day 4	Day 5	Day 6
13	20	13	0	40	3			8	31	40	51	26	23
2	14	7	31	3	50			3	23	42	39	33	22
30	7	7	5	2	4			4	37	39	39	13	41
5	0	29	7	22	2			2	21	31	54	23	12
0	26	0	4	0	7			5	17	47	77	41	30
11	10	12	14	13	11			6	17	56	44	14	16
12	13	15	12	11	16			5	19	56	44	57	18
20	7	11	25	15	17			3	13	40	35	21	18
12	11	18	9	9	6			40	23	45	86	53	37
9	11	11	8	12	9
11	5	9	10	11	8
9	10	10	11	9	11
wLH + KET								wLH + Saline
Day 1&2	Day 3&4	Day 5&6						Day 1&2	Day 3&4	Day 5&6
19.5	45.5	24.5						6	44	42
13	40.5	27.5						10	35	64
20.5	39	27						6.5	26	49
11.5	42.5	17.5						7.5	29	54
11	62	35.5						15	37	64
11.5	50	15						10	59	60
12	50	37.5						6	45	58
8	37.5	19.5						21	74	64
31.5	60.5	45						12	50	73

## Sheet: Figure 2d
Escape					Failure
Positive					Negative				Positive
Baseline	wLH	wLH + KET			Baseline	wLH	wLH + KET		Baseline	wLH	wLH + KET
32.14	11.49	36.45			26.42	10.15	12.3		9.544	43.79	36.08
79.58	119.1	75.76			50.71	17.69	10.49		142.7	148.4	110.3
68.08	158.1	195.3			118	21.92	85.78		200.9	205	138
61.24	83.59	110.3			62.46	11.04	30		97.96	132.8	68.16
157.2	179.9	112			165.3	38.52	144.2		94.59	60.09	61.01
49.11	59.7	45.84			17.68	17.46	13.6		37.68	31.53	40.68
52.26	11.08	31.99			117.1	61.27	177.2		112	47.4	20.65
34.81	15.08	33.74			19.4	9.822	16.62		32.19	50.75	51.96
73.96	69.6	167.1			102	31.25	128.1		32.15	136.7	102.2
144.3	282	253.5			35.01	21.23	109.3		225.1	291	195.2
45.2	56.02	52.97			55.91	43.99	58.64		71.98	66.68	59.3
102.3	70.57	119.5			31.19	12.15	62.22		121.9	168.8	124.9

## Sheet: Figure 2f
Baseline	wLH	wLH + KET
5.12	2.25	2.76
6.98	3.65	4.75
3.68	2.33	1.65
8.09	4.61	6.44
1.43	1.74	1.05
6.78	2.69	3.36
1.51	1.59	1.7

## Sheet: Figure 2g
Trace distance (wLH+KET)		% Failure (wLH+KET)
1.07		65
2.76		30.1724
4.75		28.0952
1.65		37.4384
6.44		16.129
1.05		43.8596
3.36		20.9677
1.7		48.1283
3.71		34.7305
2.82		63.0435
4.19		48.6486

## Sheet: Figure 2h
Trace distance (Baseline)		% Failure (wLH)
1.93		72.5
5.12		52.907
6.98		51.5924
3.68		53.0612
8.09		53.7634
1.43		85.641
6.78		38.6598
1.51		67.8756
6.16		49.4565
2.94		62.1622
2.29		59.6774

## Sheet: Figure 2i
Trace distance (Baseline)		% Failure (wLH+KET)
1.93		65
5.12		30.1724
6.98		28.0952
3.68		37.4384
8.09		16.129
1.43		43.8596
6.78		20.9677
1.51		48.1283
6.16		34.7305
2.94		63.0435
2.29		48.6486
