# Supplementary material for: Attenuated dopamine signaling after aversive learning is restored by ketamine to rescue escape actions
Source: eLife journal article supplement (doi:10.7554/elife.64041), 2021-04-27
Supplement: supp [file elife-64041-supp-v1.zip › elife_poa_e64041_Figure_3_Source_Data_File.xlsx]

## Sheet: Figure 3b
Baseline	CNO	Washout
1.05	0.1	0.6
0.5	0	0.37
0.72	0.42	0.94
1.6	0.2	1

## Sheet: Figure 3d
hM4Di+									hM4Di-
Baseline	LH	LH+KET+CNO 4h	LH+KET+CNO 24h	LH+KET 4h	LH+KET 24h	LH+KET 72h			Baseline	LH	LH+KET+CNO 4h	LH+KET+CNO 24h	LH+KET 4h	LH+KET 24h	LH+KET 72h
13.3333	90	83.3333	80						10	83.3333	6.66667	36.6667	36.6667	66.6667	96.6667
6.66667	90	66.6667	70	16.6667	50	100			0	76.6667	40	10	20	23.3333	80
0	83.3333	100	100	56.6667	33.3333	80			0	70	6.66667	76.6667	10	26.6667	20
3.33333	90	80	86.6667	16.6667	20	73.3333			0	60	0	13.3333	3.33333	3.33333	6.66667
0	86.6667	73.3333	60	30	20	70			0	53.3333	10	13.3333	0	10	83.3333
0	93.3333	90	96.6667	66.6667	53.3333	86.6667			0	73.3333	53.3333	50	36.6667	23.3333	80
10	63.3333	60	3.33333	6.66667	3.33333	0			0	83.3333	20	6.66667	20	30	90
0	83.3333	73.3333	20	0	0	20			0	63.3333	20	26.6667	0	26.6667	56.6667

## Sheet: Figure 3e
Before CNO	After CNO
2.21284	2.14136
2.8517	3.34102
3.67316	1.83595
3.72493	2.06754
2.71374	1.76662

## Sheet: Figure 3f
Baseline				LH
Before CNO	After CNO			Before CNO	After CNO
6.66667	0			86.6667	76.6667
0	3.33333			30	43.2
10	6.66667			80	65.9
13.3333	3.33333			100	90
0	10			76.6667	83.3333
				20	31.8

## Sheet: Figure 3g
hM4Di+								hM4Di-
Day 1	Day 2	Day 3	Day 4	Day 5	Day 6			Day 1	Day 2	Day 3	Day 4	Day 5	Day 6
14	1	19	60	57	26			0	0	43	74	36	23
2	17	55	71	78	70			25	1	65	64	37	20
15	14	36	58	73	57			1	5	10	33	17	13
4	15	0	40	75	63			37	11	75	62	27	83
21	5	63	68	74	77			3	0	23	31	22	15
2	0	40	69	84	61			7	17	33	53	27	19
3	1	32	72	64	85			16	28	53	81	49	20
26	11	38	82	85	96			9	31	80	83	45	46
