# Supplementary material for: Attenuated dopamine signaling after aversive learning is restored by ketamine to rescue escape actions
Source: eLife journal article supplement (doi:10.7554/elife.64041), 2021-04-27
Supplement: supp [file elife-64041-supp-v1.zip › elife_poa_e64041_Figure_4_Source_Data_File.xlsx]

## Sheet: Figure 4d
Frequency	ACSF	KET
0	0.000678835	0.000933007
0.04625	0.00278501	0.00387248
0.0925	0.00247231	0.00285916
0.13875	0.001376	0.00136936
0.185	0.00104178	0.000944401
0.23125	0.000988849	0.00114127
0.2775	0.000815809	0.000908983
0.32375	0.000493883	0.000784468
0.37	0.000736578	0.000759034
0.41625	0.000632021	0.000597603
0.4625	0.000585302	0.00070357
0.50875	0.000577885	0.000845398
0.555	0.000608355	0.000650152
0.60125	0.000621937	0.000756301
0.6475	0.00061948	0.000891143
0.69375	0.000705719	0.00105252
0.74	0.000899165	0.00103688
0.78625	0.000906907	0.000799692
0.8325	0.000674048	0.000673448
0.87875	0.000521381	0.000664875
0.925	0.000551751	0.000406794
0.97125	0.000486639	0.000558845
1.0175	0.000395693	0.000562427
1.06375	0.00048427	0.000707189
1.11	0.00049959	0.000583784
1.15625	0.000528691	0.000482515
1.2025	0.00046263	0.000592519
1.24875	0.000588532	0.00064134
1.295	0.000490365	0.000731089
1.34125	0.000883899	0.000785159
1.3875	0.00140445	0.00113162
1.43375	0.00174411	0.00204215
1.48	0.00229406	0.0037939
1.52625	0.00426554	0.00990208
1.5725	0.0284706	0.0467075
1.61875	0.0658381	0.0661789
1.665	0.0372657	0.0233224
1.71125	0.00866491	0.00467644
1.7575	0.00357808	0.0018591
1.80375	0.00191855	0.00125918
1.85	0.00130951	0.000906251
1.89625	0.000669257	0.000634744
1.9425	0.000509206	0.000499278
1.98875	0.000597141	0.000463146
2.035	0.00032948	0.000519372
2.08125	0.000442276	0.000547869
2.1275	0.000503059	0.000508666
2.17375	0.000542901	0.000491023
2.22	0.000484724	0.000512432
2.26625	0.000420876	0.000598466
2.3125	0.000474653	0.0005121
2.35875	0.000549035	0.000438321
2.405	0.000605262	0.000491554
2.45125	0.000460172	0.000547121
2.4975	0.000272384	0.000413723
2.54375	0.000283054	0.00044454
2.59	0.000379941	0.000601602
2.63625	0.000445675	0.000507481
2.6825	0.00054703	0.000389684
2.72875	0.000552817	0.000636781
2.775	0.000463963	0.000577075
2.82125	0.000484346	0.000516407
2.8675	0.000584228	0.000621715
2.91375	0.000483668	0.000605255
2.96	0.000398991	0.000555069
3.00625	0.000603695	0.00101276
3.0525	0.000950644	0.00144015
3.09875	0.00133001	0.00162012
3.145	0.00215272	0.0028121
3.19125	0.00309634	0.00380572
3.2375	0.00365085	0.00431276
3.28375	0.00287642	0.00357013
3.33	0.00187723	0.00167039
3.37625	0.00142951	0.00090788
3.4225	0.00102842	0.00056578
3.46875	0.000912033	0.000502629
3.515	0.000726172	0.000602928
3.56125	0.000648445	0.000523071
3.6075	0.000552876	0.000455289
3.65375	0.000475937	0.000361792
3.7	0.000337841	0.000380651
3.74625	0.000329644	0.000439975
3.7925	0.000341225	0.000317385
3.83875	0.000459991	0.000364452
3.885	0.000550452	0.000463511
3.93125	0.000561	0.000301749
3.9775	0.000462081	0.00022706
4.02375	0.00043095	0.000286177
4.07	0.000315949	0.000429297
4.11625	0.000371529	0.000389737
4.1625	0.000359748	0.000352148
4.20875	0.000385679	0.000504893
4.255	0.000381705	0.000367268
4.30125	0.000506551	0.000264851
4.3475	0.000466912	0.000363986
4.39375	0.000464097	0.000399261
4.44	0.000387875	0.000417352
4.48625	0.000333569	0.000339807
4.5325	0.000413883	0.000380799
4.57875	0.000570369	0.000597081
4.625	0.000607879	0.000530027
4.67125	0.000609322	0.000494498
4.7175	0.000732772	0.000617554
4.76375	0.000881593	0.000771605
4.81	0.000839282	0.00102194
4.85625	0.000900004	0.00105288
4.9025	0.000765729	0.000970925
4.94875	0.00114937	0.00076544
4.995	0.00115389	0.000635105
5.04125	0.000754259	0.000609262
5.0875	0.000580823	0.000401578
5.13375	0.00059785	0.000386907
5.18	0.000546971	0.000497792
5.22625	0.000605307	0.000527999
5.2725	0.000542777	0.000418649
5.31875	0.000536928	0.000447716
5.365	0.000679717	0.000674223
5.41125	0.000649453	0.00077538
5.4575	0.000473799	0.000554525
5.50375	0.000452494	0.000415481
5.55	0.00056599	0.000263936
5.59625	0.000431551	0.000314132
5.6425	0.000430424	0.000331552
5.68875	0.000387072	0.00030041
5.735	0.000357199	0.000401564
5.78125	0.000372676	0.000422731
5.8275	0.000586741	0.000405438
5.87375	0.000658534	0.000411235
5.92	0.000307446	0.00021829

## Sheet: Figure 4e
Max Power				Frequency at max power
ACSF	KET			ACSF	KET
0.000338215	0.000223393			0.04625	0.04625
0.000669623	0.000417344			0.04625	0.2775
0.000266576	0.000719237			2.4975	0.04625
0.001279	0.000140012			0.04625	0.04625
0.0044113	0.000193365			0.04625	0.04625
0.00453918	0.000405426			0.04625	0.04625
0.00230524	0.000186147			0.04625	0.13875
0.000588329	0.000213966			0.04625	0.13875
0.000852085	0.000218859			0.04625	0.04625
0.00351892	0.0153433			0.04625	0.04625
0.00547828	0.00013044			0.04625	0.04625
0.0177208	0.00029522			0.04625	0.04625
0.000889009	0.000527228			0.04625	0.04625
0.00303567	0.000971111			0.04625	0.04625
0.000258588	0.000692616			0.04625	0.04625
0.000790377	0.000401751			0.04625	0.04625
0.00179697	0.00156097			0.04625	0.04625
0.000858739	0.000179379			0.04625	0.04625
0.000462386	0.000497714			0.04625	1.9425
0.000451346	0.00138597			0.04625	5.735
9.68174e-05	0.000496843			0.04625	2.26625
0.000279507	0.000344545			0.04625	0.4625
0.000840184	0.0011012			0.04625	1.61875
0.000256324	0.0200114			3.93125	1.43375
0.000456105	0.000704038			0.04625	0.8325
0.000211726	0.0330902			0.04625	0.0925
0.00079877	0.0219665			0.04625	0.925
0.000596017	0.00122974			0.04625	0.04625
0.00941743	0.000581817			0.04625	1.06375
0.0133582	0.000664332			0.04625	0.04625
0.00192529	0.00123874			0.04625	0.78625
0.00719208	0.0123155			0.0925	0.97125
0.0124139	0.00293337			1.06375	0.2775
0.0035552	0.000687375			0.04625	0.04625
0.000881118	0.000848596			0.04625	0.60125
0.00150156	0.00211717			1.06375	0.04625
0.0126438	0.00211717			1.48	0.04625
0.0184517	0.000998493			0.87875	0.04625
0.0185618	0.00359451			0.4625	1.11
0.00691565	0.00344323			0.4625	0.04625
0.000461971	0.00225221			0.04625	1.43375
0.00122571	0.00381941			0.04625	0.04625
0.00318532	0.000417733			0.04625	0.04625
0.00192784	0.00275229			0.04625	0.04625
0.007683	0.000520609			0.04625	0.04625
0.00324509	0.00330603			1.0175	0.04625
0.00773758	0.0102358			0.04625	0.04625
0.00390931	0.00160343			0.04625	0.04625
0.00133846	0.00234784			0.04625	0.04625
0.000182444	0.0065471			0.04625	0.6475
0.00108453	0.000555465			0.13875	0.13875
0.000271029	0.00215851			0.04625	0.0925
0.000705614	0.00575439			0.04625	0.04625
0.00320106	0.0211037			0.04625	1.295
0.000833931	0.0221427			0.04625	0.41625
0.0019756	0.0289109			0.04625	1.3875
0.00855588	0.018834			0.6475	1.295
0.000555566	0.0221959			0.04625	0.8325
0.000845933	0.0198157			0.04625	1.5725
0.000649562	0.0260518			0.50875	0.87875
0.0129632	0.016892			1.43375	2.1275
0.00422082	0.0661789			0.04625	1.61875
0.0183652	0.0256171			1.48	2.82125
0.025803	0.0312584			1.52625	1.15625
0.020125	0.00638345			0.87875	1.89625
0.0362731	0.000913907			1.665	0.04625
0.0256885	0.00105937			0.97125	0.74
0.0144375	0.000721451			2.08125	0.04625
0.0658381	0.000284886			1.61875	0.23125
0.0212681	0.000512409			2.8675	0.04625
0.00766623	0.000369048			1.15625	0.04625
0.00658834	0.000306769			2.17375	0.04625
0.00914828	0.00213261			0.0925	0.04625
0.000864118	0.000183917			4.11625	0.04625
0.000723147	0.000747648			3.74625	3.2375
0.00101312	0.000700461			0.04625	0.04625
0.000270716	0.000285468			0.04625	0.04625
0.001134	0.000152759			0.04625	0.0925
0.000158295	0.000271927			0.04625	0.04625
0.0017229	0.00035652			0.04625	0.04625
0.00291203	0.000772432			0.04625	0.04625
0.000282081	0.000298154			0.04625	0.37
0.000256316	0.000392121			0.04625	0.04625
9.32665e-05	0.0013846			0.0925	0.04625
0.00317347	0.0125636			0.04625	0.04625
0.00128209	0.00823271			0.04625	0.04625
0.000777271	0.0114431			0.04625	0.04625
0.000217048	0.0217435			0.04625	0.04625
0.000538471	0.00721121			0.04625	0.185
0.00019445	0.00345733			0.04625	0.13875
0.000264252	0.00570049			0.04625	0.04625
0.00115245	0.00269474			0.04625	0.04625
0.00429501	0.00176836			0.04625	0.185
0.000153046	0.000304983			0.04625	0.04625
0.000138913	0.000200052			0.04625	0.04625
0.00022751	0.00627692			0.04625	0.04625
0.000779845	0.00293436			0.04625	0.04625
0.00215768	0.0541408			0.04625	0.04625
0.00824949	0.00328467			0.87875	3.33
0.000530973	0.000532529			0.04625	0.04625
0.000682017	0.0204352			0.04625	0.04625
0.00096335	0.00440295			1.61875	0.04625
0.000248213	0.0271231			0.04625	0.04625
0.000310195	0.00460615			0.13875	0.04625
0.00035598	0.00160717			3.09875	0.04625
0.00071224	0.00291502			0.04625	0.04625
0.00136685	0.000227182			0.04625	0.04625
0.000254952	0.000269671			0.04625	0.37
9.55012e-05	0.00686311			0.04625	0.04625
0.00100964	0.00646707			0.04625	0.04625
0.000996184	0.0090145			0.04625	0.04625
0.00145945	0.0027586			0.04625	0.04625
0.00112079	0.000291519			0.04625	0.04625
0.00351506	0.000695648			0.04625	0.04625
0.0162557	0.000466903			0.04625	0.04625
0.000314152	0.00103551			0.04625	0.04625
0.209023	0.00281742			0.04625	0.04625
0.0033598	0.000601597			0.04625	0.04625
0.000337744	0.000873642			0.185	0.23125
0.00458027	0.00413255			0.04625	0.04625
0.00721319	0.00797595			0.04625	0.04625
0.00200811	0.00401247			0.04625	0.04625
0.0120418	0.00736933			0.04625	0.04625
0.00146567	0.00525815			0.04625	0.04625
0.00165862	0.00105562			0.04625	0.04625
0.000889164	0.00178726			0.04625	0.04625
0.00102187	0.0107757			0.04625	0.04625
0.00155902	0.150901			0.04625	0.04625
0.00014045	0.0142216			0.04625	0.04625
0.000257698	0.00016443			0.04625	0.0925
0.000398916	0.0189251			0.04625	1.52625
0.0121091	0.000461025			0.04625	0.04625
0.000849459	0.0266723			0.04625	0.6475
0.00380055	0.00626448			0.04625	0.04625
0.0236913	0.00346418			0.04625	0.04625
0.012633	0.00211812			0.04625	0.04625
0.00236318	0.0164112			0.04625	0.04625
0.00392064	0.00476066			0.04625	0.04625
0.00767264	0.00755056			0.04625	0.04625
0.000484018	0.0126152			0.04625	0.04625
0.0762718	0.00123542			0.04625	0.04625
0.000223082	0.00801652			0.04625	0.04625
0.0148656	0.0424668			0.04625	0.50875
0.0120358	0.0361973			0.04625	1.5725
0.000460597	0.0102242			0.04625	0.87875
0.000903571	0.0729476			0.04625	0.74
0.0724732	0.062526			0.04625	0.04625
0.047421	0.0292158			0.04625	0.555
0.00139651	0.0201498			0.04625	0.925
0.0124445	0.0285618			0.6475	0.04625
0.00328979	0.0389425			0.04625	1.48
0.000462484	0.128706			0.04625	1.2025
0.00570492	0.0133368			0.32375	1.665
0.00143147	0.0465093			0.04625	0.50875
0.000257821	0.082693			0.04625	0.04625
0.0200426	0.00101241			0.04625	0.04625
0.0015536	0.00327714			0.41625	0.60125
0.00214148	0.000173685			0.04625	1.5725
0.000560285	0.0491405			0.04625	0.87875
0.00453777	0.00612089			0.04625	0.555
0.0302391	0.0580083			0.69375	1.15625
0.0101433	0.0283478			0.78625	0.97125
0.0423101	0.0929112			1.5725	1.0175
0.020222	0.0362221			0.50875	1.2025
0.0312804	0.00756265			0.555	0.925
0.0650553	0.0665158			0.04625	0.74
0.0405557	0.102243			1.3875	0.555
0.0170143	0.0967968			0.87875	1.06375
0.0157842	0.113127			0.04625	0.04625
0.152857	0.0753542			1.15625	0.555
0.00851647	0.000226696			1.80375	0.0925
0.0564011	0.00116726			0.50875	1.15625
0.00157194	0.000523232			0.04625	0.60125
0.0018365	0.000410352			0.04625	2.82125
0.00219475	0.0347109			0.555	0.04625
0.00497836	0.000335229			1.48	4.995
0.0604036	0.00672907			1.34125	0.87875
0.0412303	0.00234929			0.97125	0.97125
0.0262023	0.0101852			1.2025	0.04625
0.0973894	0.00165932			1.0175	0.04625
0.0641078	0.00196223			1.24875	0.04625
0.049327	0.0014155			0.925	0.04625
0.0101661	0.00107221			0.04625	0.13875
0.00500526	0.00736435			0.04625	0.04625
0.00598497	0.00304897			0.925	0.04625
0.0582088	0.0764821			0.78625	0.13875
0.113859	0.0065896			1.06375	0.04625
0.0776593	0.0015437			0.50875	0.04625
0.0674458	0.000399827			0.555	0.0925
0.0293188	0.000315178			1.3875	0.04625
0.000170261	0.00248151			0.04625	0.04625
0.000542206	0.00262571			0.04625	0.04625
0.00101446	0.000243195			0.04625	0.04625
0.000645106	0.00178763			0.04625	0.04625
0.00105755	0.00483409			0.04625	0.04625
0.00288477	0.0124838			0.04625	0.04625
0.00738294	0.0027202			1.06375	1.295
0.001674	0.000394952			1.11	0.60125
0.00579585	0.000775768			0.04625	1.24875
0.00104355	0.0019233			1.0175	0.04625
0.00115374	0.000456584			0.04625	0.04625
0.000693349	0.00303673			0.04625	0.04625
0.000883718	0.0034395			5.365	0.04625
0.014285	0.00170074			0.04625	0.04625
0.00239604	0.00142618			0.04625	0.04625
0.100683	0.00217544			0.13875	0.04625
0.011769	0.000368201			0.04625	0.04625
0.00386242	0.000427142			0.0925	0.0925
0.00204375	0.00175833			0.04625	0.04625
0.000555724	0.000914389			0.04625	0.04625
0.0412155	0.000964783			0.04625	0.04625
0.00559343	0.00938153			0.04625	0.04625
0.000684092	0.00146832			0.04625	0.04625
0.00821146	0.000245816			0.04625	0.04625
0.0188962	0.00026197			0.04625	0.04625
0.0231968	0.000238772			0.04625	0.04625
0.0020446	0.00023595			1.80375	0.04625
0.000375016	0.00256992			0.13875	0.04625
0.000438041	0.00602138			0.04625	0.04625
0.00468474	0.000941027			0.04625	0.04625
0.000610734	0.000216524			0.13875	0.0925
0.00417537	0.002737			0.04625	1.5725
0.00254422	0.000120576			0.04625	0.04625
0.00317924	0.00140402			0.04625	0.04625
0.00443282	0.000795722			0.04625	0.04625
0.00169131	0.000675712			0.04625	0.04625
0.000114281	0.00189648			0.04625	0.04625
0.000147064	0.060376			0.04625	0.04625
0.000901222	0.000745358			0.04625	0.04625
0.0015582	0.000913628			0.04625	0.04625
0.000534736	0.00288587			4.44	0.04625
0.0225274	0.00403122			0.04625	0.04625
0.000994395	0.000781932			0.04625	0.04625
0.00021524	0.00448018			0.04625	0.0925
0.000817656	0.00448018			0.04625	0.0925
0.000241179	0.00101684			0.04625	0.04625
0.000227051	0.00355797			0.04625	0.04625
0.00431439	0.00314653			0.04625	0.04625
0.0111084	0.00080801			0.04625	0.04625
0.000846913	0.0118173			0.04625	0.04625
0.000412956	0.0012122			0.04625	0.04625
0.00417148	0.00859884			0.04625	0.04625
0.000339456	0.00193218			0.04625	0.04625
0.00254132	0.00732224			0.04625	0.04625
0.000832041	0.000986036			0.04625	0.04625
0.00176954	0.00313728			0.04625	0.04625
0.00113456	0.00866691			0.04625	0.04625
0.0519312	0.000991818			0.04625	0.04625
0.00125179	0.000729423			0.04625	0.04625
0.000593421	0.000900399			0.04625	0.04625
0.00382701	0.00112839			0.04625	0.04625
0.000784218	0.00179775			0.04625	0.04625
0.000726155	0.00310575			0.04625	0.04625
0.017917	0.00671872			0.13875	0.04625
0.000968964	0.00278434			0.04625	0.04625
0.00886294	0.00315052			0.04625	0.04625
0.00131656	0.00301728			0.04625	0.4625
0.00349933	0.022648			0.04625	0.0925
0.0118173	0.00774975			0.04625	0.04625
0.0022105	0.00134628			0.04625	0.78625
0.0173549	0.00171559			0.04625	0.04625
0.0127124	0.0150223			0.04625	0.04625
0.0265472	0.00885234			0.04625	0.04625
0.0328198	0.00738887			0.04625	0.04625
0.0492632	0.0220126			0.04625	0.04625
0.00293605	0.00255075			0.04625	0.04625
0.128172	0.000567268			0.04625	0.04625
0.0117146	0.00947736			0.04625	0.04625
0.00233634	0.00605072			0.04625	0.04625
0.0193554	0.000818128			0.04625	0.04625
0.00654828	0.0205916			0.04625	0.04625
0.0327719	0.00286395			0.04625	0.04625
0.0462538	0.000553485			0.04625	0.04625
0.0096105	0.006281			0.04625	0.13875
0.00874903	0.00190681			0.04625	0.04625
0.00349815	0.0688373			0.04625	0.04625
0.0656019	0.0093061			0.04625	0.04625
0.00664345	0.00879359			0.60125	2.1275
0.00892223	0.0232429			0.04625	2.08125
0.0351719	0.0147812			0.04625	0.04625
0.00119031	0.0382663			1.11	1.7575
0.00805304	0.013776			0.04625	0.87875
0.0340832	0.0182099			0.04625	1.48
0.0205742	0.0419068			0.04625	0.97125
0.00050641	0.00852157			0.04625	2.17375
0.010756	0.034749			0.04625	1.2025
0.021553	0.0203584			0.04625	1.48
0.00396528	0.0255538			0.04625	1.61875
0.00103683	0.0166307			0.04625	1.89625
0.00436368	0.0096475			0.04625	0.41625
0.00722642	0.0204423			0.04625	2.3125
0.000887594	0.0134784			0.04625	1.7575
0.0114967	0.0192425			0.04625	1.34125
0.00541784	0.0207806			0.04625	1.98875
0.00144818	0.0131131			0.04625	0.04625
0.00143545	0.0184102			0.04625	1.80375
0.0107316	0.0203759			0.04625	1.71125
0.00194527	0.0293306			0.04625	1.34125
0.0421897	0.0169353			0.04625	1.3875
0.000435422	0.0573165			0.04625	1.7575
0.00310261	0.000948567			0.04625	0.04625
0.0032293	0.0154849			2.72875	1.3875
0.0218543	0.00752166			2.59	1.43375
0.0136067	0.0110157			1.80375	1.24875
0.000939365	0.0155075			1.2025	2.08125
0.00485032	0.00879455			0.04625	1.61875
0.0074319	0.000290368			0.04625	0.04625
0.0228978	0.00142855			1.7575	0.555
0.0287125	0.000967597			2.3125	0.8325
0.0142723	0.00157334			2.775	0.04625
0.0165628	0.00124706			2.4975	5.4575
0.00800305	0.00245482			0.04625	0.04625
0.0330496	0.00670699			0.04625	0.04625
0.00810366	0.000592337			0.04625	0.04625
0.0137868	0.000467928			2.1275	0.04625
0.0202609	0.0276173			2.54375	1.665
0.0357817	0.00155036			0.04625	1.34125
0.00808071	0.000505892			2.72875	0.04625
0.0193874	0.0314513			2.3125	1.2025
0.0338784	0.0335348			0.04625	1.52625
0.0364856	0.00154346			0.04625	0.04625
0.0630105	0.00291718			2.59	0.04625
0.0011541	0.001461			3.7	0.13875
0.0136181	0.785853			2.1275	0.04625
0.00147996	0.000505261			0.04625	0.4625
0.00843334	0.000643898			1.98875	2.6825
0.010782	0.000604094			3.2375	0.04625
0.00527644	0.0043812			2.63625	1.80375
0.000203374	0.00503408			0.04625	0.04625
0.000601831	0.0111212			1.34125	2.08125
0.000722071	0.0123764			0.04625	1.11
0.0014586	0.00387079			0.04625	0.04625
0.000856503	0.00332337			0.04625	0.04625
0.00129986	0.00285227			0.04625	0.04625
0.00112831	0.00743411			0.04625	0.04625
0.00159319	0.0031528			0.04625	1.665
0.000427177	0.0182867			0.04625	0.04625
0.0036352	0.0449162			0.0925	1.61875
0.0106912	0.00996413			1.71125	1.48
0.00233347	0.0242595			0.04625	0.04625
0.0139025	0.00210605			0.04625	0.04625
0.00935388	0.00072361			1.3875	0.04625
0.0128488	0.0246561			1.7575	0.04625
0.00356823	0.00564304			0.04625	0.04625
0.00465934	0.0117453			0.04625	0.04625
0.00519164	0.00950411			0.04625	0.04625
0.0131824	0.105988			1.52625	0.04625
0.000523689	0.0249809			2.63625	0.04625
0.00212081	0.00445807			0.04625	0.04625
0.00113488	0.00515143			0.04625	0.04625
0.00557784	0.00585645			2.035	0.04625
0.00168501	0.00398538			0.04625	0.04625
0.0103016	0.00420527			2.17375	0.04625
0.00857723	0.000702826			1.2025	0.04625
0.00089058	0.00147794			0.04625	0.04625
0.00119922	0.00863639			0.13875	0.04625
0.000810364	0.00494678			0.185	0.04625
0.0191303	0.00520848			0.04625	0.04625
0.0132774	0.206082			0.04625	0.04625
0.00297673	0.00913906			1.85	0.04625
0.0246417	0.0198074			0.04625	1.24875
0.0219956	0.0299985			1.61875	1.15625
0.0035072	0.0660142			1.0175	1.52625
0.117916	0.0323602			0.04625	0.74
0.00989066	0.0201696			0.04625	1.06375
0.00409055	0.02041			0.04625	0.8325
0.069183	0.0498893			0.04625	0.97125
0.00121562	0.0121547			0.04625	1.61875
0.0450197	0.0139411			0.04625	0.8325
0.00893403	0.000893585			0.04625	0.04625
0.0514105	0.000413099			0.04625	0.04625
0.0116422	0.000348726			0.04625	0.04625
0.00732679	0.0110708			0.04625	0.04625
0.0236118	0.031184			0.04625	1.295
0.0331969	0.0071017			0.04625	0.04625
0.0137331	0.000586591			0.04625	0.04625
0.020232	0.00382192			0.04625	0.925
0.0029678	0.00368753			0.04625	0.04625
0.00684687	0.000791534			0.04625	0.04625
0.00920307	0.00380555			0.04625	1.06375
0.00593001	0.0050285			0.04625	1.61875
0.0132716	0.00300865			0.04625	1.0175
0.491073	0.038894			0.04625	2.035
0.0575615	0.0172538			0.04625	0.04625
0.0040521	0.0196447			1.06375	0.04625
0.0135423	0.0607983			1.3875	0.04625
0.0285272	0.00715833			1.61875	0.04625
0.0216684	0.0646475			0.8325	0.04625
0.0122234	0.0196716			1.295	0.04625
0.0936556	0.00877997			0.04625	1.11
0.0277165	0.00337954			1.24875	0.04625
0.00976666	0.00291129			1.52625	0.04625
0.013918	0.0143847			0.97125	0.04625
0.0275764	0.00796646			0.04625	0.04625
0.0374688	0.00421501			0.04625	1.80375
0.00316635	0.0183766			0.04625	1.52625
0.00276286	0.00153184			0.04625	0.04625
0.0286921	0.00724689			0.04625	0.04625
0.00456786	0.0209107			0.04625	0.04625
0.000444286	0.0116037			0.04625	0.04625
0.00366667	0.0101993			0.04625	1.2025
0.00238458	0.00718083			0.04625	0.04625
0.000938273	0.00522078			0.04625	2.08125
0.00331882	0.00765808			0.04625	0.04625
0.00338323	0.0275634			0.04625	0.04625
0.0122277	0.0102913			0.50875	0.04625
0.0275102	0.00110234			2.08125	0.04625
0.0155857	0.00945501			0.04625	0.04625
0.0244671	0.0208328			0.04625	0.04625
0.097745	0.0145026			0.04625	1.5725
				0.04625
				0.04625
				0.04625
				1.24875
				0.04625
				0.04625
				0.04625
				0.04625
				2.22
				0.04625
				0.04625
				0.04625
				0.04625
				0.04625
				0.04625
				0.04625
				0.04625
				0.04625
				0.04625
				0.04625
				0.04625
				0.04625
				0.04625
				0.04625

## Sheet: Figure 4f
Δ Power	Number of neurons			Δ Frequency	Number of neurons
-0.08	2			-4	0
-0.06	10			-3	4
-0.04	10			-2	21
-0.02	41			-1	41
0	262			0	295
0.02	46			1	29
0.04	18			2	13
0.06	4			3	2
0.08	8			4	1

## Sheet: Figure 4i
ACSF	KET
0.796141	0.853274
1.0605	1.01183
1.21005	1.01129
2.42199	2.15919
2.16518	2.51959
4.16026	1.03672
3.47929	3.28397
3.15527	3.27486
2.45192	1.92284

## Sheet: Figure 4k
ACSF	KET
55.7805	41.6196
26.1983	27.8623
35.9998	29.7731
32.9753	33.7405
40.8189	42.9975
21.4483	21.5373
28.0322	27.9158
27.4151	28.2071
21.0387	18.855
43.1157	40.3863
25.2849	26.3475
18.7841	20.2817
23.3263	24.2229
16.2582	16.0258
44.2011	36.0149
25.3497	27.9793
23.8255	21.6608

## Sheet: Figure 4l
ACSF	KET
2436.66	2379.27
2572.99	2682.91
1021.59	1551.88
280.442	983.587
283.044	415.352
500.98	406.771
3947.13	3137.65
2300.14	3168.87
3453.7	1532.35
507.591	567.897
2095.43	1847.97
5692.94	4862.09
4167.83	2753.99
4447.76	5419.51
2220.7	3387.77
5047.83	5405.7
2819.48	4036.01

## Sheet: Figure 4n
ACSF	KET
30.9702	33.6744
46.546	50.988
48.5167	43.2581
70.5265	90.6314
49.5976	60.4401
70.5658	59.1211
61.6389	63.2922
67.5017	66.7801
54.6773	55.3118
109.075	70.4864
41.9283	51.9444
48.7694	49.0078

## Sheet: Figure 4o
ACSF	KET
502.139	501.382
494.251	416.413
1727.66	1710.71
1347.36	1310.52
364.717	283.743
138.997	212.378
410.106	345.143
402.178	342.114
1033.75	1263.9
291.102	589.104
535.988	802.118
2168.39	1961.5
