# Supplementary material for: Attenuated dopamine signaling after aversive learning is restored by ketamine to rescue escape actions
Source: eLife journal article supplement (doi:10.7554/elife.64041), 2021-04-27
Supplement: supp [file elife-64041-supp-v1.zip › elife_poa_e64041_Figure_5_figure_supplement_1_source_data_1.xlsx]

## Sheet: Figure_S8c
During shock				After shock
LH	LH + ACSF			LH	LH + ACSF
-0.058	-0.052			0.13	0.122
-0.034	-0.042			0.112	0.024
-0.072	-0.062			0.154	0.156
-0.03	-0.028			0.08	0.076
0.036	-0.068			0.102	0.212
-0.02	-0.032			0.05	0.048
