# Supplementary material for: Attenuated dopamine signaling after aversive learning is restored by ketamine to rescue escape actions
Source: eLife journal article supplement (doi:10.7554/elife.64041), 2021-04-27
Supplement: supp [file elife-64041-supp-v1.zip › elife_poa_e64041_Figure_5_Source_Data_File.xlsx]

## Sheet: Figure 5b
mPFC + KET					mPFC + ACSF					PAG + KET					PPTg + KET					VTA + KET
Baseline	LH	LH + KET			Baseline	LH	LH + ACSF			Baseline	LH	LH + KET			Baseline	LH	LH + KET			Baseline	LH	LH + KET
0	60	43.3333			0	73.3333	83.3333			0	60	30			0	3.33333	13.3333			0	100	93.3333
6.66667	70	30			3.33333	56.6667	50			0	30	33.3333			3.33333	100	26.6667			0	100	63.3333
0	86.6667	13.3333			0	90	80			6.66667	86.6667	33.3333			0	73.3333	73.3333			0	93.3333	90
0	46.6667	16.6667			6.66667	83.3333	63.3333			0	83.3333	83.3333			0	56.6667	100			0	90	83.3333
10	90	20			0	66.6667	73.3333			0	50	66.6667			0	72.2222	70			0	66.6667	60
0	100	10			0	30	43.3333			0	100	100			0	100	100			3.33333	70	100
										0	60	33.3333			3.33333	50	66.6667			0	50	70
										0	100	100			0	100	100			0	60	80

## Sheet: Figure 5d
Peak (dF/F)
During shock				After shock
Induction start	Induction end	LH + KET		Induction start	Induction end	LH + KET
-0.05	-0.03	-0.033		0.073	0.04	0.085
-0.086	-0.01	-0.117		0.088	0.036	0.12
-0.056	-0.06	-0.05		0.055	0.06	0.078
-0.16	-0.05	-0.084		0.29	0.11	0.247
-0.13	-0.07	-0.147		0.2	0.1	0.244
-0.146	-0.08	-0.106		0.144	0.09	0.207
