# Supplementary material for: Attenuated dopamine signaling after aversive learning is restored by ketamine to rescue escape actions
Source: eLife journal article supplement (doi:10.7554/elife.64041), 2021-04-27
Supplement: supp [file elife-64041-supp-v1.zip › elife_poa_e64041_Figure_6_figure_supplement_1_source_data_1.xlsx]

## Sheet: Figure_S9d
Baseline	Saline	5 - 10	15 - 20	25 - 30	24h
66.41	42.84	94.02	103.2	148.2	129.4
47.33	50.01	40.83	74.7	126.7	101
42.91	34.45	35.52	50.03	96.97	70.63
39.89	43.76	65.25	88.43	60.33	94.13
46.77	67.62	71.48	91.14	107.6	75.04
45.28	53.25	69.23	82.8	123.2	99.6
