# Supplementary material for: Attenuated dopamine signaling after aversive learning is restored by ketamine to rescue escape actions
Source: eLife journal article supplement (doi:10.7554/elife.64041), 2021-04-27
Supplement: supp [file elife-64041-supp-v1.zip › elife_poa_e64041_Figure_6_figure_supplement_2_source_data_1.xlsx]

## Sheet: Figure_S10b
hM4Di-						hM4Di+
Baseline	LH	LH+KET+CNO 4h	LH+KET+CNO 24h			Baseline	LH	LH+KET+CNO 4h	LH+KET+CNO 24h
0	80	26.6667	13.3333			0	26.6667	80	60
0	90	43.3333	23.3333			0	46.6667	26.6667	40
10	40	13.3333	20			0	100	100	100
0	33.3333	6.66667	0			0	50	70	60
0	56.6667	30	20			0	56.6667	56.6667	73.3333
0	63.3333	46.6667	30			6.66667	70	46.6667	53.3333
