# Supplementary material for: Attenuated dopamine signaling after aversive learning is restored by ketamine to rescue escape actions
Source: eLife journal article supplement (doi:10.7554/elife.64041), 2021-04-27
Supplement: supp [file elife-64041-supp-v1.zip › elife_poa_e64041_Figure_6_figure_supplement_3_source_data_1.xlsx]

## Sheet: Figure_S11a
Baseline	LH			midpoint	Baseline	LH			x	Baseline	LH
0	96.6667			2	84	1			0	0.0882252	7.01e-05
0	80			6	9	0			1	0.0989169	8.14e-05
0	96.6667			10	9	0			2	0.103648	9.43e-05
0	86.6667			14	2	0			3	0.1015	0.000108958
0	100			18	1	1			4	0.0928929	0.000125675
3.33333	33.3333			22	0	0			5	0.0794535	0.000144663
0	86.6667			26	0	1			6	0.0635121	0.000166185
0	43.3333			30	0	4			7	0.0474475	0.000190521
13.3333	90			34	0	2			8	0.0331271	0.00021798
6.66667	90			38	0	1			9	0.0216155	0.000248893
0	83.3333			42	0	2			10	0.0131814	0.000283614
3.33333	90			46	0	2			11	0.00751227	0.000322526
0	86.6667			50	0	4			12	0.00400123	0.000366034
0	93.3333			54	0	2			13	0.00199173	0.000414572
10	63.3333			58	0	12			14	0.00092657	0.000468597
0	83.3333			62	0	3			15	0.000402847	0.000528591
10	83.3333			66	0	5			16	0.000163687	0.00059506
0	76.6667			70	0	4			17	6.22e-05	0.000668533
0	70			74	0	4			18	2.21e-05	0.000749559
0	60			78	0	7			19	7.32e-06	0.000838706
0	53.3333			82	0	9			20	2.27e-06	0.000936557
0	73.3333			86	0	8			21	6.57e-07	0.00104371
0	83.3333			90	0	9			22	1.78e-07	0.00116077
0	63.3333			94	0	3			23	4.5e-08	0.00128835
6.66667	86.6667			98	0	23			24	1.06e-08	0.00142706
0	30								25	2.35e-09	0.00157751
10	80								26	4.86e-10	0.00174029
13.3333	100								27	9.38e-11	0.00191599
0	76.6667								28	1.69e-11	0.00210516
0	20								29	2.85e-12	0.00230833
3.33333	76.6667								30	4.49e-13	0.002526
6.66667	43.2								31	6.62e-14	0.00275859
3.33333	65.9								32	9.11e-15	0.00300651
10	90								33	1.17e-15	0.00327009
0	83.3333								34	1.41e-16	0.00354959
0	31.8								35	1.58e-17	0.00384518
0	100								36	1.66e-18	0.00415696
0	100								37	1.63e-19	0.00448493
0	96.6667								38	1.49e-20	0.004829
0	96.6667								39	1.28e-21	0.00518895
3.33333	53.3333								40	1.03e-22	0.00556446
10	100								41	7.68e-24	0.00595507
0	56.6667								42	5.37e-25	0.00636021
6.66667	100								43	3.51e-26	0.00677918
6.66667	76.6667								44	2.15e-27	0.00721114
0	83.3333								45	1.22e-28	0.00765512
16.6667	86.6667								46	6.54e-30	0.00810999
0	100								47	3.26e-31	0.00857452
0	100								48	1.52e-32	0.00904733
0	86.6667								49	6.62e-34	0.0095269
0	56.6667								50	2.7e-35	0.0100116
0	93.3333								51	1.03e-36	0.0104997
10	96.6667								52	3.65e-38	0.0109893
3.3333	66.6667								53	1.21e-39	0.0114785
3.33333	82.9								54	3.76e-41	0.0119653
0	66.6667								55	1.09e-42	0.0124474
10	100								56	2.96e-44	0.0129228
0	57.1								57	7.51e-46	0.0133892
6.66667	90								58	1.78e-47	0.0138444
0	60								59	3.94e-49	0.0142862
0	70								60	8.16e-51	0.0147122
10	86.6667								61	1.58e-52	0.0151203
0	46.6667								62	2.85e-54	0.0155082
0	90								63	4.82e-56	0.015874
3.33333	100								64	7.6e-58	0.0162156
0	73.3333								65	1.12e-59	0.016531
6.66667	56.6667								66	1.55e-61	0.0168184
0	90								67	1.99e-63	0.0170763
0	83.3333								68	2.4e-65	0.017303
0	66.6667								69	2.7e-67	0.0174973
0	30								70	2.84e-69	0.017658
6.66667	60								71	2.8e-71	0.0177841
0	30								72	2.57e-73	0.017875
0	86.6667								73	2.21e-75	0.0179299
0	83.3333								74	1.77e-77	0.0179487
0	50								75	1.33e-79	0.0179312
0	100								76	9.3e-82	0.0178774
0	60								77	6.09e-84	0.0177878
3.33333	100								78	3.73e-86	0.0176628
0	3.33333								79	2.13e-88	0.0175032
0	100								80	1.14e-90	0.01731
0	73.3333								81	5.7e-93	0.0170843
0	56.6667								82	2.66e-95	0.0168275
3.33333	72.2222								83	1.16e-97	0.016541
0	100								84	4.74e-100	0.0162265
0	50								85	1.81e-102	0.0158858
0	100								86	6.44e-105	0.0155208
0	100								87	2.14e-107	0.0151336
0	100								88	6.67e-110	0.0147261
0	93.3333								89	1.94e-112	0.0143007
3.33333	90								90	5.28e-115	0.0138594
0	66.6667								91	1.34e-117	0.0134046
0	70								92	3.18e-120	0.0129386
0	50								93	7.06e-123	0.0124634
0	60								94	1.46e-125	0.0119815
10	80								95	2.84e-128	0.0114949
0	90								96	5.14e-131	0.0110057
0	40								97	8.69e-134	0.0105161
0	33.3333								98	1.38e-136	0.0100279
0	56.6667								99	2.03e-139	0.00954304
0	63.3333								100	2.81e-142	0.00906326
0	26.6667
0	46.6667
0	100
6.66667	50
	56.6667
	70

## Sheet: Figure_S11b
Day 1&2	Day 3&4			midpoint	Day 1&2	Day 3&4			x	Day 1&2	Day 3&4
19.5	45.5			2	5	0			0	0.0138509	0.000143502
13	40.5			6	6	0			1	0.0173594	0.000177203
20.5	39			10	10	0			2	0.0213293	0.000217868
11.5	42.5			14	5	0			3	0.0256923	0.000266701
11	62			18	3	1			4	0.03034	0.000325059
11.5	50			22	4	1			5	0.0351247	0.000394465
12	50			26	0	2			6	0.0398653	0.000476608
8	37.5			30	1	1			7	0.0443571	0.000573353
31.5	65.5			34	0	1			8	0.0483856	0.000686736
6	42			38	0	4			9	0.0517434	0.000818966
9.5	35			42	0	4			10	0.0542473	0.00097241
6.5	26			46	0	3			11	0.0557554	0.00114958
7.5	28.5			50	0	4			12	0.0561799	0.00135313
15.5	37.5			54	0	1			13	0.0554958	0.00158579
10.5	59			58	0	3			14	0.0537433	0.00185037
5.5	45			62	0	2			15	0.0510239	0.00214971
21.5	74			66	0	4			16	0.0474907	0.00248662
12	50.5			70	0	1			17	0.043334	0.00286382
7.5	39.5			74	0	1			18	0.0387644	0.0032839
9.5	63			78	0	0			19	0.0339957	0.00374922
14.5	47			82	0	1			20	0.029228	0.00426187
9.5	20			86	0	0			21	0.0246354	0.00482356
13	65.5			90	0	0			22	0.0203566	0.00543553
1	54.5			94	0	0			23	0.0164906	0.00609851
2	52			98	0	0			24	0.0130964	0.00681261
18.5	60								25	0.0101966	0.00757723
0	58.5								26	0.00778291	0.00839103
13	64.5								27	0.0058239	0.00925183
3	21.5								28	0.00427239	0.0101566
24	68.5								29	0.00307265	0.0111013
1.5	27								30	0.00216641	0.0120812
12	43								31	0.00149745	0.0130904
22	67								32	0.00101473	0.0141222
20	81.5								33	0.000674116	0.0151692
									34	0.000439039	0.0162228
									35	0.000280322	0.0172743
									36	0.000175467	0.0183139
									37	0.000107676	0.0193316
									38	6.48e-05	0.0203172
									39	3.82e-05	0.0212602
									40	2.21e-05	0.0221503
									41	1.25e-05	0.0229772
									42	6.96e-06	0.0237314
									43	3.79e-06	0.0244038
									44	2.02e-06	0.0249861
									45	1.06e-06	0.0254711
									46	5.44e-07	0.0258526
									47	2.74e-07	0.0261257
									48	1.35e-07	0.0262869
									49	6.54e-08	0.0263341
									50	3.1e-08	0.0262667
									51	1.44e-08	0.0260855
									52	6.56e-09	0.025793
									53	2.93e-09	0.0253929
									54	1.28e-09	0.0248902
									55	5.52e-10	0.0242914
									56	2.32e-10	0.023604
									57	9.58e-11	0.0228363
									58	3.88e-11	0.0219975
									59	1.54e-11	0.0210974
									60	5.98e-12	0.0201461
									61	2.28e-12	0.0191541
									62	8.52e-13	0.0181317
									63	3.12e-13	0.0170893
									64	1.12e-13	0.0160368
									65	3.95e-14	0.0149837
									66	1.36e-14	0.0139388
									67	4.61e-15	0.0129105
									68	1.53e-15	0.011906
									69	4.98e-16	0.0109319
									70	1.59e-16	0.00999389
									71	4.96e-17	0.00909664
									72	1.52e-17	0.00824393
									73	4.57e-18	0.00743868
									74	1.35e-18	0.0066829
									75	3.89e-19	0.0059778
									76	1.1e-19	0.00532384
									77	3.05e-20	0.00472081
									78	8.31e-21	0.00416789
									79	2.22e-21	0.00366372
									80	5.8e-22	0.00320654
									81	1.49e-22	0.00279421
									82	3.74e-23	0.00242431
									83	9.21e-24	0.00209424
									84	2.22e-24	0.00180123
									85	5.27e-25	0.00154249
									86	1.22e-25	0.00131517
									87	2.78e-26	0.00111648
									88	6.21e-27	0.000943681
									89	1.36e-27	0.000794159
									90	2.91e-28	0.000665423
									91	6.12e-29	0.000555131
									92	1.26e-29	0.000461106
									93	2.55e-30	0.000381342
									94	5.05e-31	0.000314004
									95	9.81e-32	0.000257432
									96	1.87e-32	0.000210135
									97	3.49e-33	0.000170782
									98	6.38e-34	0.000138195
									99	1.14e-34	0.00011134
									100	2.01e-35	8.93e-05
