# Supplementary material for: Attenuated dopamine signaling after aversive learning is restored by ketamine to rescue escape actions
Source: eLife journal article supplement (doi:10.7554/elife.64041), 2021-04-27
Supplement: supp [file elife-64041-supp-v1.zip › elife_poa_e64041_Figure_6_source_data_1.xlsx]

## Sheet: Figure 6c
L2/3	L5/6
19.4	96.5
7	91.6

## Sheet: Figure 6f
Before CNO	After CNO
100	40
160	120
40	20
20	0
60	20
80	20

## Sheet: Figure 6g
hM3Dq+						hM3Dq-
Baseline	LH	LH + CNO 2h	LH + CNO 4h			Baseline	LH	LH + CNO 2h	LH + CNO 4h
6.66667	86.6667	80	0			0	100	100	100
0	100	63.3333	80			0	100	100	96.6667
16.6667	100	70	13.3333			0	96.6667	96.6667	93.3333
0	86.6667	3.33333	0			0	96.6667	63	40
0	56.6667	36.6667	23.3333			0	53.3333	73.3333	60
0	93.3333	40	23.3333			0	100	66.6667	86.6667
0	96.6667	90	66.6667			3.33333	56.6667	50	43.3333
0	66.6667	6.66667	0			10	100	100	96.6667
						0	76.6667	80	76.6667
						6.66667	83.3333	53.3333	56.6667

## Sheet: Figure 6h
Saline	CNO
13.5	66.3
9.4	45.9
6.4	47.7

## Sheet: Figure 6i
Before CNO	After CNO
2.669	1.979
3.605	5.131
3.531	2.391
3.258	2.794
2.442	2.01
