# Supplementary figures and images for: Attenuated dopamine signaling after aversive learning is restored by ketamine to rescue escape actions
Source: eLife journal article supplement (doi:10.7554/elife.64041), 2021-04-27

**a**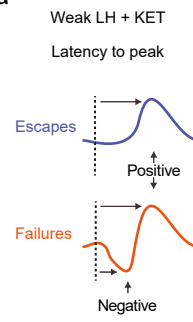**b**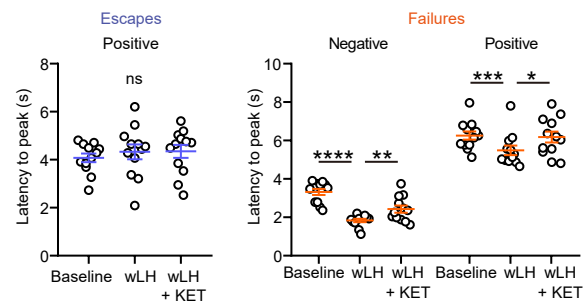

Supplement: supp [file elife-64041-supp-v1.zip]

**a**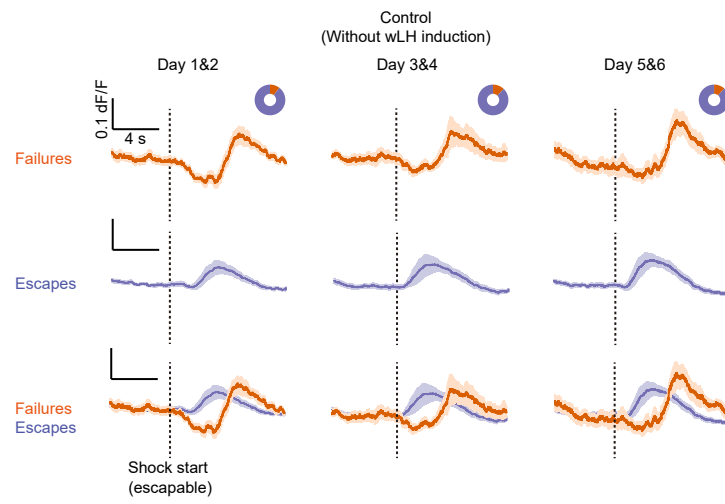**b**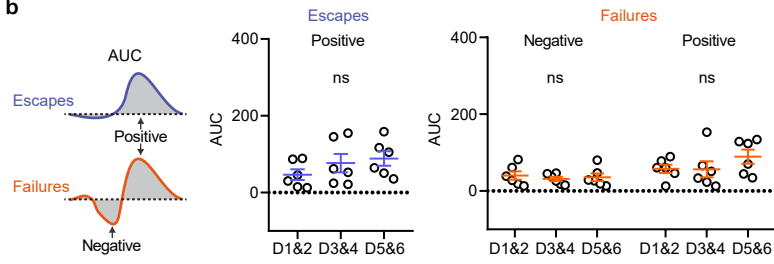

Supplement: supp [file elife-64041-supp-v1.zip]

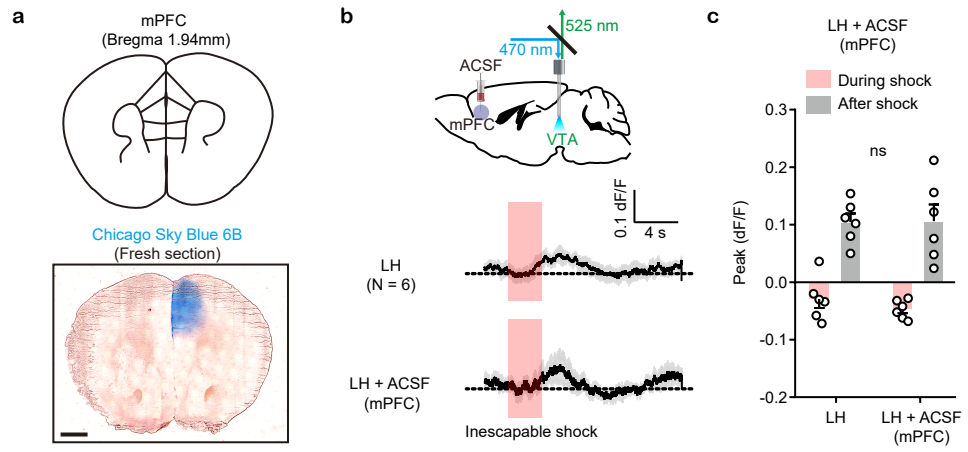

Supplement: supp [file elife-64041-supp-v1.zip]

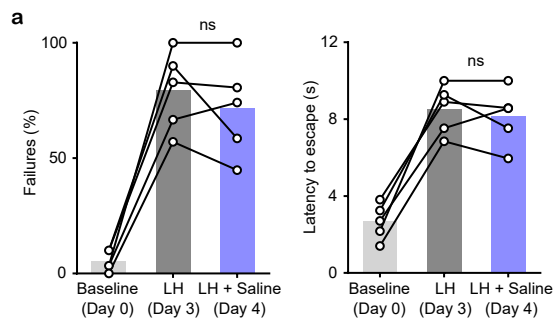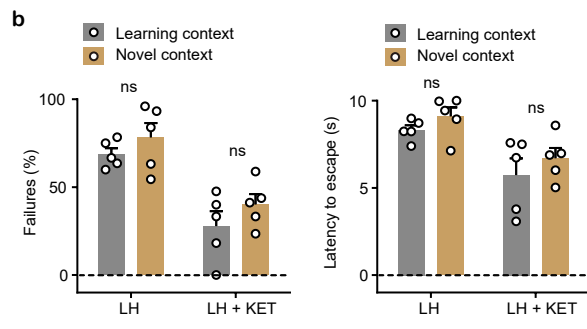

Supplement: supp [file elife-64041-supp-v1.zip]

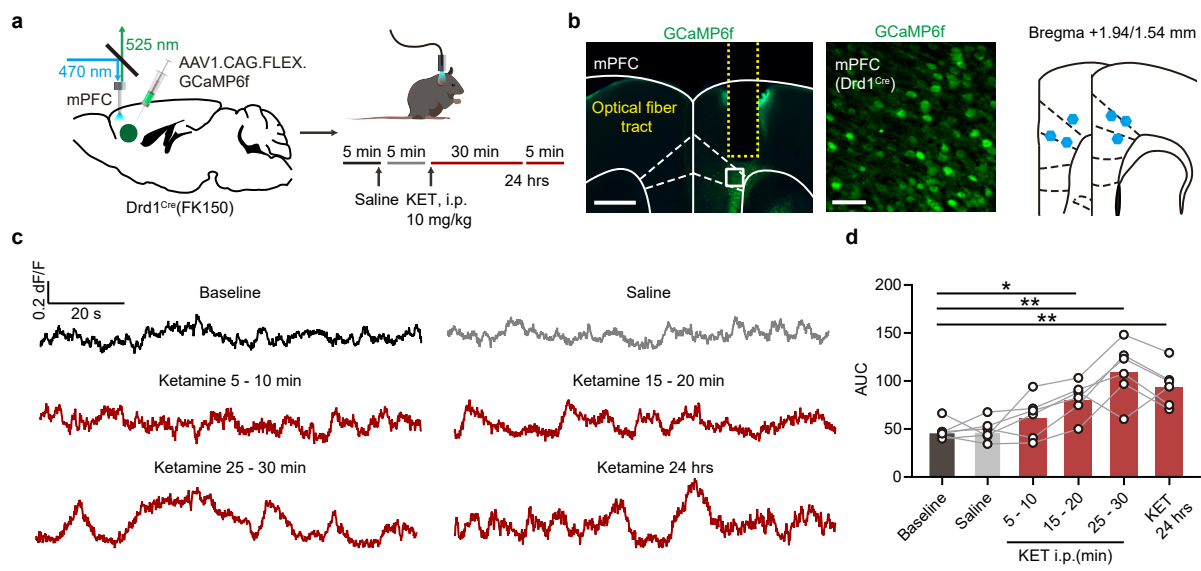

Supplement: supp [file elife-64041-supp-v1.zip]

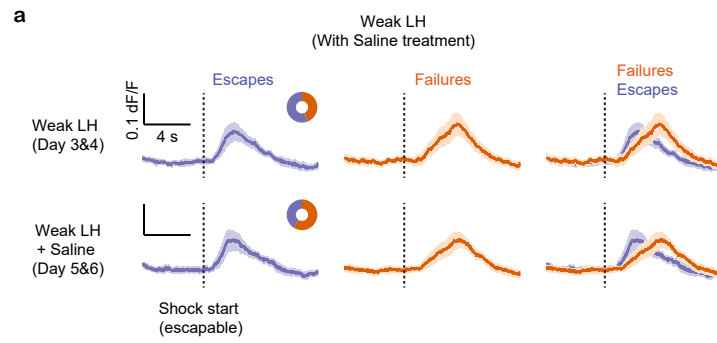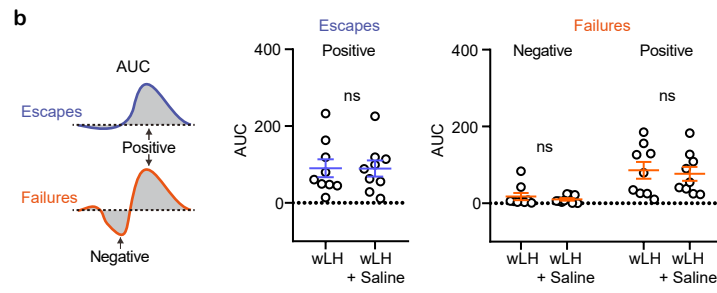

Supplement: supp [file elife-64041-supp-v1.zip]

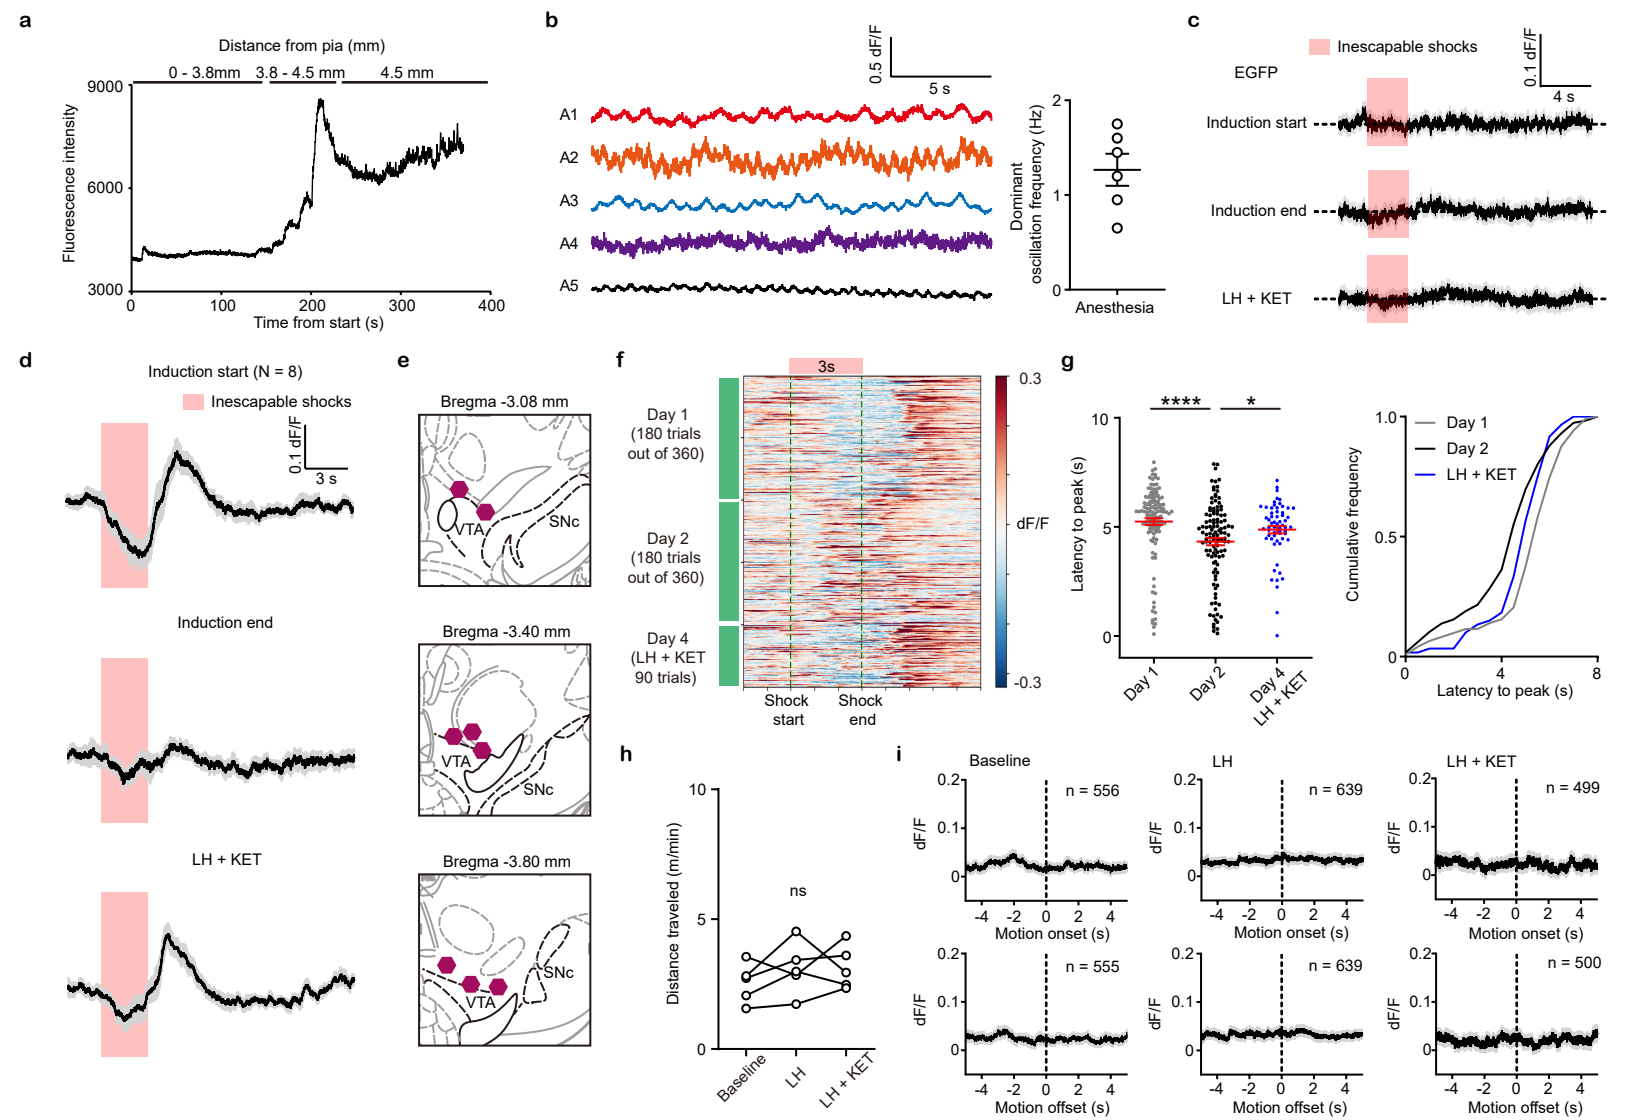

Supplement: supp [file elife-64041-supp-v1.zip › elife_poa_e64041_Figure_1_figure_supplement_2.pdf]

**a**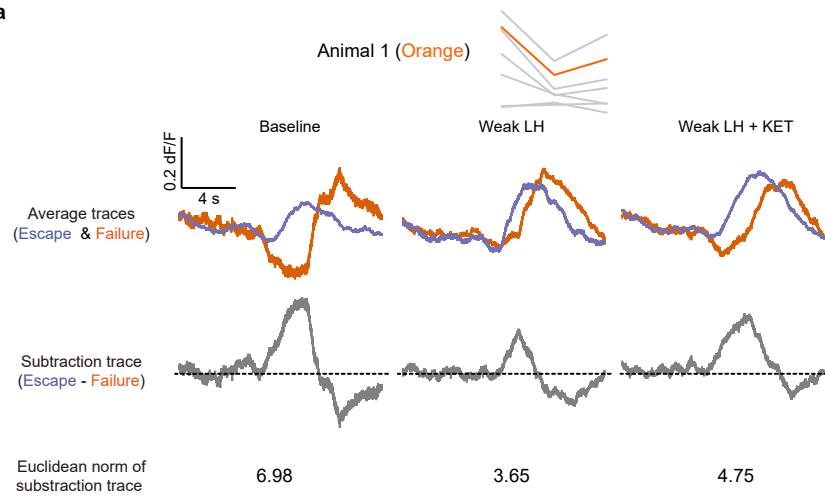**b**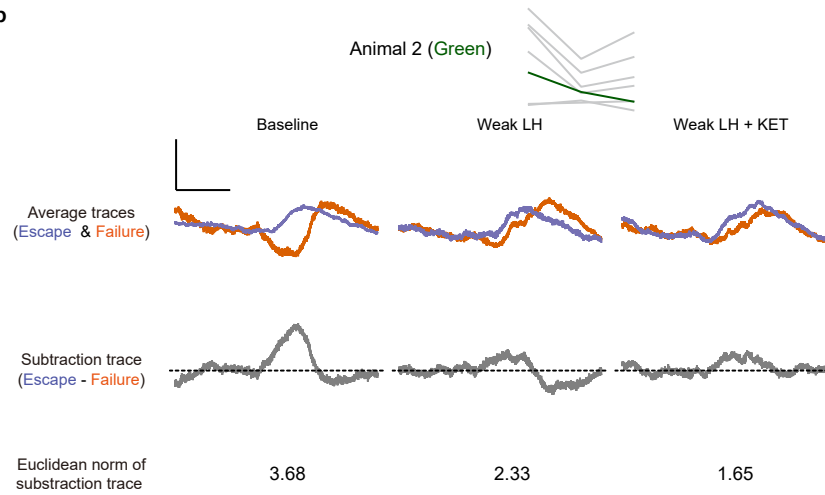

Supplement: supp [file elife-64041-supp-v1.zip › elife_poa_e64041_Figure_2_figure_supplement_5.pdf]

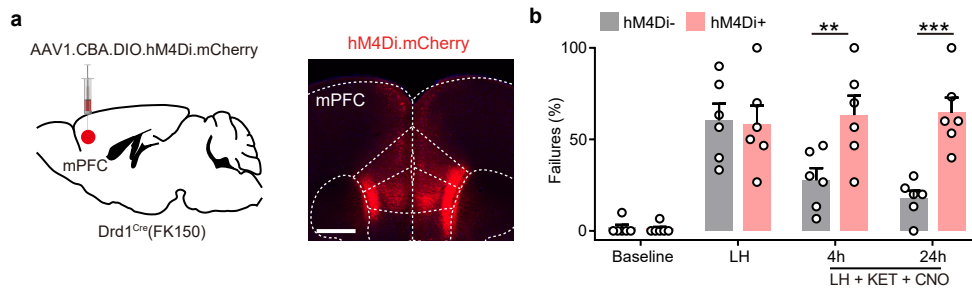

Supplement: supp [file elife-64041-supp-v1.zip › elife_poa_e64041_Figure_6_figure_supplement_2.pdf]

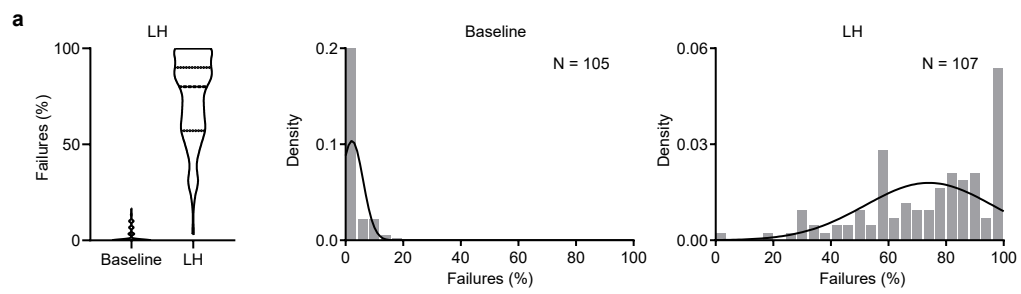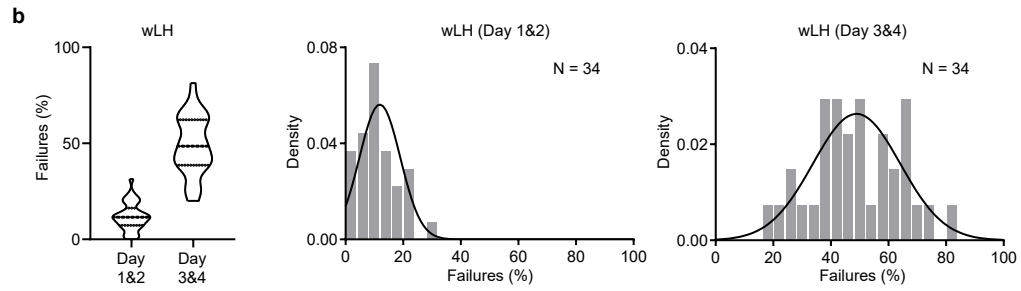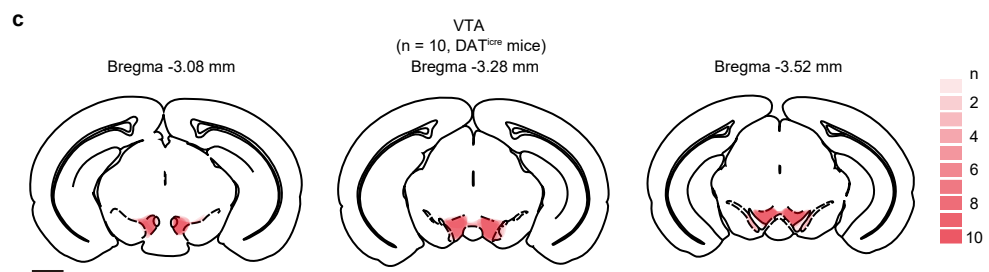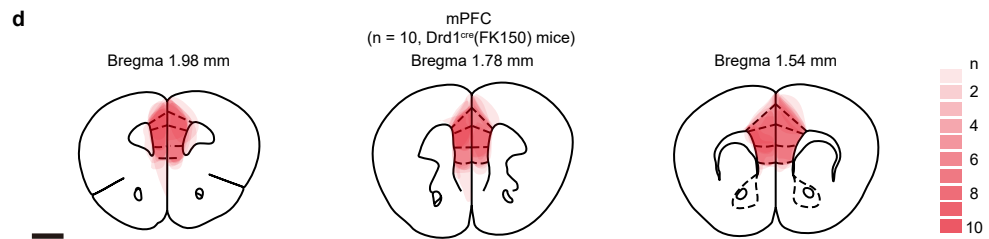

Supplement: supp [file elife-64041-supp-v1.zip › elife_poa_e64041_Figure_6_figure_supplement_3.pdf]
